# Supplementary material
Source: Springer Nature journal article supplement (https://www.springermedizin.de/resource/supplementary/12937_2013_653_MOESM1_ESM.pdf/25653860)

Group 1 \*<sup>€</sup>

Ham Sandwich.....  
90 min

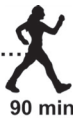

Ham Sandwich.....  
3 miles

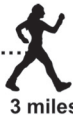

Ham Sandwich.....  
23 min

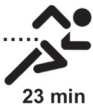

Group 2

Ham Sandwich.....  
290 calories

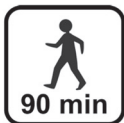

Ham Sandwich.....  
290 calories

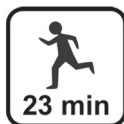

Ham Sandwich.....  
290 calories

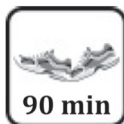

Group 3 †

Ham Sandwich.....  
290 calories

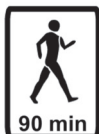

Ham Sandwich.....  
290 calories

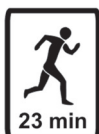

Ham Sandwich.....  
290 calories

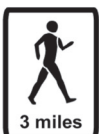

Ham Sandwich.....  
290 calories

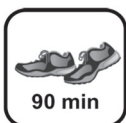

Final labels based on participant feedback ‡

Ham Sandwich.....  
290 calories

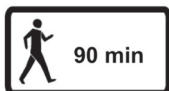

Ham Sandwich.....  
290 calories

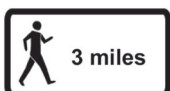

Supplement: MOESM1 [file 25653860]
